# Supplementary material
Source: PubMed Central journal article supplement (PMC4581026)
Supplement: rstb20140221supp1.pdf [file rstb20140221supp1.pdf]

Supplementary material for Brown JS, Cunningham JJ, Gatenby RA, 2015. The multiple facets of Peto's Paradox: a life history model for the evolution of cancer suppression. *Phil. Trans. R. Soc. B.* doi: 10.1098/rstb.2014.0221

## **A. Definitions**

|                        |                                                                                                            |
|------------------------|------------------------------------------------------------------------------------------------------------|
| $x$                    | Age.                                                                                                       |
| $l_x$                  | Probability of a newborn surviving until age $x$ , in the absence of cancer.                               |
| $m_x$                  | Expected number of newborns produced by an individual of age $x$ .                                         |
| $\hat{l}_x$            | Adjusted survival probability to age $x$ including survival from cancer.                                   |
| $\hat{m}_x$            | Adjusted expected number of newborns due to the cost of cancer suppression adaptations.                    |
| $f_x$                  | Fraction of total deaths in the population that occur among individuals between the ages of $x-1$ to $x$ . |
| $q_x$                  | Probability of NOT dying of cancer at age $x$ .                                                            |
| $c_x$                  | Probability that a death between ages $x-1$ and $x$ is caused by cancer.                                   |
| $1 - c_x$              | Probability that a death between ages $x-1$ and $x$ is caused by something else.                           |
| $R_0$ <i>no cancer</i> | Net reproductive rate with no cancer suppression adaptations.                                              |
| $r$ <i>no cancer</i>   | Per capita growth rate in the absence of cancer suppression adaptations.                                   |
| $R_0$                  | Adjusted net reproductive rate with inclusion of cancer suppression adaptations.                           |
| $r$                    | Adjusted per capita growth rate with cancer suppression adaptations.                                       |
| $u^*$                  | Fitness maximizing level of cancer suppression as an adaptation.                                           |
| $C$                    | Probability that a newborn dies from cancer over the course of its lifetime.                               |

## B. Life Tables

**Type 2 Beaver Life Table** ( $r = 0.2046, u^* = 0.101, C = 0.022$ )

| $x$ | $l_x$  | $m_x$ | $\hat{l}_x$ | $\hat{m}_x$ | $f_x$  | $q_x$  | $c_x$  | $1 - c_x$ |
|-----|--------|-------|-------------|-------------|--------|--------|--------|-----------|
| 1   | 0.4971 | 0.5   | 0.4956      | 0.4895      | 0.5044 | 0.997  | 0.006  | 0.994     |
| 2   | 0.3129 | 1.5   | 0.3101      | 1.4684      | 0.1856 | 0.994  | 0.016  | 0.984     |
| 3   | 0.2115 | 2     | 0.2077      | 1.9579      | 0.1023 | 0.991  | 0.027  | 0.973     |
| 4   | 0.1259 | 2     | 0.1222      | 1.9579      | 0.0856 | 0.988  | 0.0288 | 0.9712    |
| 5   | 0.096  | 2     | 0.0918      | 1.9579      | 0.0304 | 0.985  | 0.0593 | 0.9407    |
| 6   | 0.0735 | 2     | 0.069       | 1.9579      | 0.0228 | 0.9821 | 0.0711 | 0.9289    |
| 7   | 0.0614 | 2     | 0.0564      | 1.9579      | 0.0126 | 0.9791 | 0.1122 | 0.8878    |
| 8   | 0.0477 | 2     | 0.0428      | 1.9579      | 0.0136 | 0.9762 | 0.0966 | 0.9034    |
| 9   | 0.0439 | 2     | 0.0383      | 1.9579      | 0.0045 | 0.9732 | 0.2513 | 0.7487    |
| 10  | 0.0348 | 2     | 0.0295      | 1.9579      | 0.0088 | 0.9703 | 0.1262 | 0.8738    |
| 11  | 0.0215 | 2     | 0.0176      | 1.9579      | 0.0119 | 0.9674 | 0.0782 | 0.9218    |
| 12  | 0.0187 | 2     | 0.0148      | 1.9579      | 0.0028 | 0.9645 | 0.2153 | 0.7847    |
| 13  | 0.0115 | 2     | 0.0087      | 1.9579      | 0.006  | 0.9616 | 0.0909 | 0.9091    |
| 14  | 0.01   | 2     | 0.0073      | 1.9579      | 0.0014 | 0.9587 | 0.2419 | 0.7581    |

**Type 1 Beaver Life Table** ( $r = 0.2754, u^* = 0.0808, C = 0.0217$ )

| $x$ | $l_x$       | $m_x$ | $\hat{l}_x$ | $\hat{m}_x$ | $f_x$  | $q_x$  | $c_x$  | $1 - c_x$ |
|-----|-------------|-------|-------------|-------------|--------|--------|--------|-----------|
| 1   | 0.5         | 0.5   | 0.4981      | 0.4916      | 0.5019 | 0.9962 | 0.0075 | 0.9925    |
| 2   | 0.45        | 1.5   | 0.4449      | 1.4749      | 0.0532 | 0.9925 | 0.0699 | 0.9301    |
| 3   | 0.36        | 2     | 0.3519      | 1.9666      | 0.093  | 0.9888 | 0.0532 | 0.9468    |
| 4   | 0.18        | 2     | 0.1733      | 1.9666      | 0.1786 | 0.985  | 0.0291 | 0.9709    |
| 5   | 0.036       | 2     | 0.034       | 1.9666      | 0.1393 | 0.9813 | 0.0228 | 0.9772    |
| 6   | 0.00648     | 2     | 0.006       | 1.9666      | 0.028  | 0.9776 | 0.0265 | 0.9735    |
| 7   | 0.0010368   | 2     | 0.0009      | 1.9666      | 0.0051 | 0.974  | 0.0301 | 0.9699    |
| 8   | 0.000145152 | 2     | 0.0001      | 1.9666      | 0.0008 | 0.9703 | 0.0334 | 0.9666    |
| 9   | 1.74E-05    | 2     | 0           | 1.9666      | 0.0001 | 0.9666 | 0.0365 | 0.9635    |
| 10  | 1.74E-06    | 2     | 0           | 1.9666      | 0      | 0.963  | 0.0395 | 0.9605    |
| 11  | 1.39E-07    | 2     | 0           | 1.9666      | 0      | 0.9594 | 0.0423 | 0.9577    |
| 12  | 8.36E-09    | 2     | 0           | 1.9666      | 0      | 0.9558 | 0.0449 | 0.9551    |
| 13  | 3.34E-10    | 2     | 0           | 1.9666      | 0      | 0.9522 | 0.0474 | 0.9526    |
| 14  | 6.68E-12    | 2     | 0           | 1.9666      | 0      | 0.9486 | 0.0498 | 0.9502    |

**Type 3 Beaver Life Table** ( $r = 0.175, u^* = 0.1212, C = 0.0192$ )

| $x$ | $l_x$  | $m_x$ | $\hat{l}_x$ | $\hat{m}_x$ | $f_x$  | $q_x$  | $c_x$  | $1 - c_x$ |
|-----|--------|-------|-------------|-------------|--------|--------|--------|-----------|
| 1   | 0.5000 | 0.5   | 0.4987      | 0.4872      | 0.5013 | 0.9975 | 0.005  | 0.995     |
| 2   | 0.2750 | 1.5   | 0.2729      | 1.4617      | 0.2258 | 0.995  | 0.011  | 0.989     |
| 3   | 0.1705 | 2     | 0.1679      | 1.949       | 0.105  | 0.9925 | 0.0194 | 0.9806    |
| 4   | 0.1108 | 2     | 0.1081      | 1.949       | 0.0599 | 0.99   | 0.0278 | 0.9722    |
| 5   | 0.0831 | 2     | 0.08        | 1.949       | 0.028  | 0.9875 | 0.0476 | 0.9524    |
| 6   | 0.0665 | 2     | 0.0631      | 1.949       | 0.0169 | 0.985  | 0.0697 | 0.9303    |
| 7   | 0.0565 | 2     | 0.0527      | 1.949       | 0.0104 | 0.9826 | 0.1039 | 0.8961    |
| 8   | 0.0509 | 2     | 0.0465      | 1.949       | 0.0062 | 0.9801 | 0.1672 | 0.8328    |
| 9   | 0.0463 | 2     | 0.0413      | 1.949       | 0.0051 | 0.9776 | 0.1984 | 0.8016    |
| 10  | 0.0426 | 2     | 0.0371      | 1.949       | 0.0042 | 0.9752 | 0.237  | 0.763     |
| 11  | 0.0396 | 2     | 0.0335      | 1.949       | 0.0036 | 0.9727 | 0.2791 | 0.7209    |
| 12  | 0.0372 | 2     | 0.0306      | 1.949       | 0.003  | 0.9703 | 0.3289 | 0.6711    |
| 13  | 0.0354 | 2     | 0.0282      | 1.949       | 0.0024 | 0.9679 | 0.3991 | 0.6009    |
| 14  | 0.0340 | 2     | 0.0261      | 1.949       | 0.002  | 0.9654 | 0.4664 | 0.5336    |

**Vole Life Table**

( $r = 0.0576, u^* = 0.0606, C = 0.004$ )

| $x$  | $l_x$  | $m_x$ | $\hat{l}_x$ | $\hat{m}_x$ | $f_x$  | $q_x$  | $c_x$  | $1 - c_x$ |
|------|--------|-------|-------------|-------------|--------|--------|--------|-----------|
| 0.25 | 0.18   | 1     | 0.1798      | 0.9876      | 0.8202 | 0.9987 | 0.0015 | 0.9985    |
| 0.5  | 0.126  | 2     | 0.1255      | 1.9751      | 0.0542 | 0.9975 | 0.0083 | 0.9917    |
| 0.75 | 0.0882 | 3     | 0.0875      | 2.9627      | 0.038  | 0.9962 | 0.0124 | 0.9876    |
| 1    | 0.0617 | 3     | 0.0609      | 2.9627      | 0.0266 | 0.995  | 0.0164 | 0.9836    |
| 1.25 | 0.0432 | 3     | 0.0424      | 2.9627      | 0.0185 | 0.9937 | 0.0205 | 0.9795    |
| 1.5  | 0.03   | 3     | 0.0292      | 2.9627      | 0.0132 | 0.9925 | 0.024  | 0.976     |
| 1.75 | 0.021  | 3     | 0.0203      | 2.9627      | 0.0089 | 0.9912 | 0.0284 | 0.9716    |
| 2    | 0.0147 | 3     | 0.014       | 2.9627      | 0.0062 | 0.99   | 0.0323 | 0.9677    |
| 2.25 | 0.0103 | 3     | 0.0097      | 2.9627      | 0.0043 | 0.9888 | 0.0362 | 0.9638    |
| 2.5  | 0.007  | 3     | 0.0065      | 2.9627      | 0.0032 | 0.9875 | 0.0375 | 0.9625    |

**Naked Mole Rat Life Table**

( $r = 0.003, u^* = 0.4545, C = 0.054$ )

| $x$ | $l_x$    | $m_x$    | $\hat{l}_x$ | $\hat{m}_x$ | $f_x$  | $q_x$  | $c_x$  | $1 - c_x$ |
|-----|----------|----------|-------------|-------------|--------|--------|--------|-----------|
| 1   | 0.5      | 0        | 0.4997      | 0           | 0.5003 | 0.9993 | 0.0013 | 0.9987    |
| 2   | 0.45     | 0        | 0.4491      | 0           | 0.0506 | 0.9987 | 0.0132 | 0.9868    |
| 3   | 0.4275   | 0        | 0.4258      | 0           | 0.0233 | 0.998  | 0.0386 | 0.9614    |
| 4   | 0.406125 | 0        | 0.4034      | 0           | 0.0224 | 0.9973 | 0.0508 | 0.9492    |
| 5   | 0.385819 | 0        | 0.382       | 0           | 0.0215 | 0.9967 | 0.0627 | 0.9373    |
| 6   | 0.366528 | 0.032333 | 0.3614      | 0.0286      | 0.0206 | 0.996  | 0.0743 | 0.9257    |
| 7   | 0.348201 | 0.034035 | 0.3417      | 0.0301      | 0.0197 | 0.9953 | 0.0856 | 0.9144    |
| 8   | 0.330791 | 0.071652 | 0.3229      | 0.0635      | 0.0188 | 0.9947 | 0.0966 | 0.9034    |
| 9   | 0.314252 | 0.075423 | 0.3049      | 0.0668      | 0.018  | 0.994  | 0.1073 | 0.8927    |
| 10  | 0.298539 | 0.079392 | 0.2877      | 0.0703      | 0.0172 | 0.9933 | 0.1178 | 0.8822    |
| 11  | 0.283612 | 0.083571 | 0.2713      | 0.074       | 0.0164 | 0.9927 | 0.1281 | 0.8719    |
| 12  | 0.269432 | 0.175939 | 0.2557      | 0.1559      | 0.0156 | 0.992  | 0.1381 | 0.8619    |
| 13  | 0.25596  | 0.185199 | 0.2408      | 0.1641      | 0.0149 | 0.9913 | 0.1478 | 0.8522    |
| 14  | 0.243162 | 0.194946 | 0.2266      | 0.1727      | 0.0142 | 0.9907 | 0.1574 | 0.8426    |
| 15  | 0.231004 | 0.205206 | 0.2132      | 0.1818      | 0.0135 | 0.99   | 0.1667 | 0.8333    |
| 16  | 0.219454 | 0.216007 | 0.2003      | 0.1913      | 0.0128 | 0.9893 | 0.1758 | 0.8242    |
| 17  | 0.208481 | 0.227376 | 0.1882      | 0.2014      | 0.0122 | 0.9887 | 0.1847 | 0.8153    |
| 18  | 0.198057 | 0.239343 | 0.1766      | 0.212       | 0.0116 | 0.988  | 0.1934 | 0.8066    |
| 19  | 0.188154 | 0.25194  | 0.1657      | 0.2232      | 0.011  | 0.9873 | 0.2019 | 0.7981    |
| 20  | 0.178746 | 0.2652   | 0.1553      | 0.2349      | 0.0104 | 0.9867 | 0.2103 | 0.7897    |
| 21  | 0.169809 | 0.279158 | 0.1455      | 0.2473      | 0.0098 | 0.986  | 0.2184 | 0.7816    |
| 22  | 0.161319 | 0.440775 | 0.1362      | 0.3905      | 0.0093 | 0.9854 | 0.2264 | 0.7736    |
| 23  | 0.153253 | 0.618632 | 0.1274      | 0.548       | 0.0088 | 0.9847 | 0.2342 | 0.7658    |
| 24  | 0.14559  | 0.813989 | 0.1191      | 0.7211      | 0.0083 | 0.984  | 0.2419 | 0.7581    |
| 25  | 0.138311 | 0.856831 | 0.1112      | 0.759       | 0.0078 | 0.9834 | 0.2494 | 0.7506    |
| 26  | 0.12448  | 0.761627 | 0.0984      | 0.6747      | 0.0129 | 0.9827 | 0.1473 | 0.8527    |
| 27  | 0.112032 | 0.846253 | 0.087       | 0.7496      | 0.0114 | 0.9821 | 0.152  | 0.848     |
| 28  | 0.100828 | 0.940281 | 0.0768      | 0.8329      | 0.0102 | 0.9814 | 0.1567 | 0.8433    |
| 29  | 0.090746 | 0.783567 | 0.0678      | 0.6941      | 0.009  | 0.9808 | 0.1614 | 0.8386    |
| 30  | 0.081671 | 0.87063  | 0.0598      | 0.7712      | 0.008  | 0.9801 | 0.166  | 0.834     |

**Elephant Life Table**      ( $r = 0.0099, u^* = 0.5051, C = 0.2156$ )

| $x$ | $l_x$    | $m_x$ | $\hat{l}_x$ | $\hat{m}_x$ | $f_x$  | $q_x$  | $c_x$  | $1 - c_x$ |
|-----|----------|-------|-------------|-------------|--------|--------|--------|-----------|
| 1   | 0.9      | 0     | 0.8995      | 0           | 0.1005 | 0.9994 | 0.006  | 0.994     |
| 2   | 0.828    | 0     | 0.8265      | 0           | 0.073  | 0.9988 | 0.0148 | 0.9852    |
| 3   | 0.77004  | 0     | 0.7673      | 0           | 0.0592 | 0.9982 | 0.0252 | 0.9748    |
| 4   | 0.723838 | 0     | 0.7195      | 0           | 0.0478 | 0.9976 | 0.0386 | 0.9614    |
| 5   | 0.687646 | 0     | 0.6815      | 0           | 0.038  | 0.997  | 0.0568 | 0.9432    |
| 6   | 0.66014  | 0     | 0.6518      | 0           | 0.0296 | 0.9964 | 0.0828 | 0.9172    |
| 7   | 0.640336 | 0     | 0.6296      | 0           | 0.0222 | 0.9958 | 0.1231 | 0.8769    |
| 8   | 0.627529 | 0     | 0.6141      | 0           | 0.0156 | 0.9952 | 0.194  | 0.806     |
| 9   | 0.614978 | 0.015 | 0.5985      | 0.013       | 0.0155 | 0.9946 | 0.213  | 0.787     |
| 10  | 0.602679 | 0.04  | 0.583       | 0.0348      | 0.0155 | 0.994  | 0.2311 | 0.7689    |
| 11  | 0.590625 | 0.062 | 0.5676      | 0.0539      | 0.0154 | 0.9934 | 0.2485 | 0.7515    |
| 12  | 0.578813 | 0.085 | 0.5522      | 0.0738      | 0.0154 | 0.9928 | 0.265  | 0.735     |
| 13  | 0.567236 | 0.11  | 0.5369      | 0.0956      | 0.0153 | 0.9922 | 0.2808 | 0.7192    |
| 14  | 0.555892 | 0.125 | 0.5218      | 0.1086      | 0.0152 | 0.9916 | 0.296  | 0.704     |
| 15  | 0.544774 | 0.125 | 0.5067      | 0.1086      | 0.015  | 0.991  | 0.3105 | 0.6895    |
| 16  | 0.533878 | 0.125 | 0.4918      | 0.1086      | 0.0149 | 0.9904 | 0.3244 | 0.6756    |
| 17  | 0.523201 | 0.125 | 0.4771      | 0.1086      | 0.0148 | 0.9898 | 0.3378 | 0.6622    |
| 18  | 0.512737 | 0.125 | 0.4625      | 0.1086      | 0.0146 | 0.9892 | 0.3506 | 0.6494    |
| 19  | 0.502482 | 0.125 | 0.4481      | 0.1086      | 0.0144 | 0.9886 | 0.3629 | 0.6371    |
| 20  | 0.492432 | 0.125 | 0.4339      | 0.1086      | 0.0142 | 0.988  | 0.3748 | 0.6252    |
| 21  | 0.482584 | 0.125 | 0.4198      | 0.1086      | 0.014  | 0.9874 | 0.3862 | 0.6138    |
| 22  | 0.472932 | 0.125 | 0.406       | 0.1086      | 0.0138 | 0.9868 | 0.3972 | 0.6028    |
| 23  | 0.463474 | 0.125 | 0.3924      | 0.1086      | 0.0136 | 0.9862 | 0.4079 | 0.5921    |
| 24  | 0.454204 | 0.125 | 0.379       | 0.1086      | 0.0134 | 0.9856 | 0.4181 | 0.5819    |
| 25  | 0.44512  | 0.125 | 0.3659      | 0.1086      | 0.0131 | 0.985  | 0.428  | 0.572     |
| 26  | 0.436218 | 0.125 | 0.353       | 0.1086      | 0.0129 | 0.9844 | 0.4375 | 0.5625    |
| 27  | 0.427493 | 0.125 | 0.3403      | 0.1086      | 0.0126 | 0.9838 | 0.4468 | 0.5532    |
| 28  | 0.418943 | 0.125 | 0.328       | 0.1086      | 0.0124 | 0.9833 | 0.4557 | 0.5443    |
| 29  | 0.410564 | 0.125 | 0.3158      | 0.1086      | 0.0121 | 0.9827 | 0.4643 | 0.5357    |
| 30  | 0.402353 | 0.125 | 0.304       | 0.1086      | 0.0119 | 0.9821 | 0.4727 | 0.5273    |
| 31  | 0.394306 | 0.125 | 0.2924      | 0.1086      | 0.0116 | 0.9815 | 0.4808 | 0.5192    |
| 32  | 0.38642  | 0.125 | 0.281       | 0.1086      | 0.0113 | 0.9809 | 0.4887 | 0.5113    |
| 33  | 0.378692 | 0.125 | 0.27        | 0.1086      | 0.011  | 0.9803 | 0.4963 | 0.5037    |
| 34  | 0.371118 | 0.125 | 0.2592      | 0.1086      | 0.0108 | 0.9797 | 0.5037 | 0.4963    |
| 35  | 0.363695 | 0.125 | 0.2487      | 0.1086      | 0.0105 | 0.9791 | 0.5108 | 0.4892    |
| 36  | 0.356422 | 0.125 | 0.2385      | 0.1086      | 0.0102 | 0.9785 | 0.5178 | 0.4822    |
| 37  | 0.349293 | 0.125 | 0.2286      | 0.1086      | 0.0099 | 0.9779 | 0.5246 | 0.4754    |
| 38  | 0.342307 | 0.125 | 0.2189      | 0.1086      | 0.0096 | 0.9773 | 0.5311 | 0.4689    |
| 39  | 0.335461 | 0.125 | 0.2096      | 0.1086      | 0.0094 | 0.9768 | 0.5375 | 0.4625    |
| 40  | 0.325397 | 0.125 | 0.1984      | 0.1086      | 0.0111 | 0.9762 | 0.4427 | 0.5573    |
| 41  | 0.315635 | 0.125 | 0.1878      | 0.1086      | 0.0107 | 0.9756 | 0.4488 | 0.5512    |
| 42  | 0.306166 | 0.125 | 0.1776      | 0.1086      | 0.0102 | 0.975  | 0.4547 | 0.5453    |
| 43  | 0.296981 | 0.125 | 0.1679      | 0.1086      | 0.0097 | 0.9744 | 0.4604 | 0.5396    |
| 44  | 0.288072 | 0.112 | 0.1586      | 0.0973      | 0.0093 | 0.9738 | 0.4661 | 0.5339    |
| 45  | 0.27943  | 0.085 | 0.1497      | 0.0738      | 0.0089 | 0.9732 | 0.4716 | 0.5284    |
| 46  | 0.271047 | 0.062 | 0.1412      | 0.0539      | 0.0085 | 0.9726 | 0.477  | 0.523     |
| 47  | 0.262915 | 0.04  | 0.1332      | 0.0348      | 0.0081 | 0.9721 | 0.4823 | 0.5177    |
| 48  | 0.255028 | 0.025 | 0.1255      | 0.0217      | 0.0077 | 0.9715 | 0.4875 | 0.5125    |
| 49  | 0.247377 | 0.015 | 0.1182      | 0.013       | 0.0073 | 0.9709 | 0.4926 | 0.5074    |

**Primitive Human Life Table** ( $r = 0.0032, u^* = 0.3939, C = 0.0998$ )

| $x$ | $l_x$    | $m_x$ | $\hat{l}_x$ | $\hat{m}_x$ | $f_x$  | $q_x$  | $c_x$  | $1 - c_x$ |
|-----|----------|-------|-------------|-------------|--------|--------|--------|-----------|
| 12  | 0.5      | 0.15  | 0.4954      | 0.1357      | 0.5046 | 0.9908 | 0.0181 | 0.9819    |
| 13  | 0.46     | 0.18  | 0.4512      | 0.1628      | 0.0442 | 0.99   | 0.1111 | 0.8889    |
| 14  | 0.4232   | 0.2   | 0.4106      | 0.1809      | 0.0406 | 0.9892 | 0.1186 | 0.8814    |
| 15  | 0.389344 | 0.22  | 0.3734      | 0.199       | 0.0372 | 0.9885 | 0.126  | 0.874     |
| 16  | 0.358196 | 0.22  | 0.3393      | 0.199       | 0.0341 | 0.9877 | 0.1332 | 0.8668    |
| 17  | 0.329541 | 0.22  | 0.3081      | 0.199       | 0.0312 | 0.9869 | 0.1403 | 0.8597    |
| 18  | 0.313064 | 0.25  | 0.2887      | 0.2262      | 0.0195 | 0.9862 | 0.2166 | 0.7834    |
| 19  | 0.297411 | 0.25  | 0.2702      | 0.2262      | 0.0184 | 0.9854 | 0.2258 | 0.7742    |
| 20  | 0.28254  | 0.25  | 0.2528      | 0.2262      | 0.0175 | 0.9847 | 0.2348 | 0.7652    |
| 21  | 0.268413 | 0.25  | 0.2363      | 0.2262      | 0.0165 | 0.9839 | 0.2436 | 0.7564    |
| 22  | 0.254992 | 0.22  | 0.2207      | 0.199       | 0.0156 | 0.9831 | 0.2522 | 0.7478    |
| 23  | 0.242243 | 0.22  | 0.2059      | 0.199       | 0.0147 | 0.9824 | 0.2606 | 0.7394    |
| 24  | 0.230131 | 0.22  | 0.192       | 0.199       | 0.0139 | 0.9816 | 0.2689 | 0.7311    |
| 25  | 0.218624 | 0.22  | 0.1789      | 0.199       | 0.0131 | 0.9809 | 0.2769 | 0.7231    |
| 26  | 0.201134 | 0.22  | 0.1614      | 0.199       | 0.0176 | 0.9801 | 0.1992 | 0.8008    |
| 27  | 0.185043 | 0.22  | 0.1454      | 0.199       | 0.016  | 0.9793 | 0.2052 | 0.7948    |
| 28  | 0.17024  | 0.2   | 0.1309      | 0.1809      | 0.0145 | 0.9786 | 0.2112 | 0.7888    |
| 29  | 0.156621 | 0.2   | 0.1177      | 0.1809      | 0.0131 | 0.9778 | 0.217  | 0.783     |
| 30  | 0.144091 | 0.2   | 0.1058      | 0.1809      | 0.0119 | 0.9771 | 0.2228 | 0.7772    |
| 31  | 0.132564 | 0.18  | 0.0951      | 0.1628      | 0.0108 | 0.9763 | 0.2284 | 0.7716    |
| 32  | 0.121959 | 0.18  | 0.0853      | 0.1628      | 0.0097 | 0.9756 | 0.234  | 0.766     |
| 33  | 0.112202 | 0.16  | 0.0765      | 0.1448      | 0.0088 | 0.9748 | 0.2395 | 0.7605    |
| 34  | 0.103226 | 0.16  | 0.0686      | 0.1448      | 0.0079 | 0.9741 | 0.2449 | 0.7551    |
| 35  | 0.092903 | 0.14  | 0.0601      | 0.1267      | 0.0085 | 0.9733 | 0.2107 | 0.7893    |
| 36  | 0.083613 | 0.14  | 0.0526      | 0.1267      | 0.0075 | 0.9725 | 0.2154 | 0.7846    |
| 37  | 0.075252 | 0.14  | 0.046       | 0.1267      | 0.0066 | 0.9718 | 0.22   | 0.78      |
| 38  | 0.067726 | 0.14  | 0.0402      | 0.1267      | 0.0058 | 0.971  | 0.2245 | 0.7755    |
| 39  | 0.060954 | 0.14  | 0.0351      | 0.1267      | 0.0051 | 0.9703 | 0.229  | 0.771     |
| 40  | 0.051811 | 0.14  | 0.0289      | 0.1267      | 0.0062 | 0.9695 | 0.1688 | 0.8312    |
| 41  | 0.044039 | 0.1   | 0.0238      | 0.0905      | 0.0051 | 0.9688 | 0.1722 | 0.8278    |
| 42  | 0.037433 | 0.1   | 0.0196      | 0.0905      | 0.0042 | 0.968  | 0.1756 | 0.8244    |
| 43  | 0.031818 | 0.1   | 0.0161      | 0.0905      | 0.0035 | 0.9673 | 0.179  | 0.821     |
| 44  | 0.027046 | 0.1   | 0.0132      | 0.0905      | 0.0029 | 0.9666 | 0.1823 | 0.8177    |
| 45  | 0.022989 | 0.1   | 0.0109      | 0.0905      | 0.0024 | 0.9658 | 0.1856 | 0.8144    |

**Modern Human Life Table**

( $r = -0.0111, u^* = 0.5152, C = 0.4909$ )

| $x$ | $l_x$   | $m_x$   | $\hat{l}_x$ | $\hat{m}_x$ | $f_x$  | $q_x$  | $c_x$  | $1 - c_x$ |
|-----|---------|---------|-------------|-------------|--------|--------|--------|-----------|
| 15  | 0.993   | 0.01155 | 0.9842      | 0.01        | 0.0158 | 0.9912 | 0.5578 | 0.4422    |
| 16  | 0.993   | 0.01155 | 0.975       | 0.01        | 0.0093 | 0.9906 | 1      | 0         |
| 17  | 0.9921  | 0.01155 | 0.9643      | 0.01        | 0.0106 | 0.99   | 0.9169 | 0.0831    |
| 18  | 0.9921  | 0.01155 | 0.9541      | 0.01        | 0.0102 | 0.9894 | 1      | 0         |
| 19  | 0.9921  | 0.01155 | 0.9435      | 0.01        | 0.0107 | 0.9888 | 1      | 0         |
| 20  | 0.99174 | 0.04305 | 0.932       | 0.0372      | 0.0114 | 0.9882 | 0.9701 | 0.0299    |
| 21  | 0.9912  | 0.04305 | 0.92        | 0.0372      | 0.012  | 0.9877 | 0.9577 | 0.0423    |
| 22  | 0.9912  | 0.04305 | 0.9081      | 0.0372      | 0.0119 | 0.9871 | 1      | 0         |
| 23  | 0.9912  | 0.04305 | 0.8959      | 0.0372      | 0.0123 | 0.9865 | 1      | 0         |
| 24  | 0.9912  | 0.04305 | 0.8833      | 0.0372      | 0.0126 | 0.9859 | 1      | 0         |
| 25  | 0.9903  | 0.063   | 0.8695      | 0.0545      | 0.0138 | 0.9853 | 0.9417 | 0.0583    |
| 26  | 0.9894  | 0.063   | 0.8555      | 0.0545      | 0.014  | 0.9847 | 0.9438 | 0.0562    |
| 27  | 0.9894  | 0.063   | 0.8419      | 0.0545      | 0.0135 | 0.9842 | 1      | 0         |
| 28  | 0.9894  | 0.063   | 0.8281      | 0.0545      | 0.0138 | 0.9836 | 1      | 0         |
| 29  | 0.9894  | 0.063   | 0.814       | 0.0545      | 0.0141 | 0.983  | 1      | 0         |
| 30  | 0.9885  | 0.0672  | 0.799       | 0.0581      | 0.015  | 0.9824 | 0.9508 | 0.0492    |
| 31  | 0.9876  | 0.0672  | 0.7838      | 0.0581      | 0.0152 | 0.9818 | 0.9523 | 0.0477    |
| 32  | 0.9876  | 0.0672  | 0.7691      | 0.0581      | 0.0147 | 0.9813 | 1      | 0         |
| 33  | 0.9867  | 0.0672  | 0.7535      | 0.0581      | 0.0155 | 0.9807 | 0.955  | 0.045     |
| 34  | 0.9867  | 0.0672  | 0.7385      | 0.0581      | 0.015  | 0.9801 | 1      | 0         |
| 35  | 0.9858  | 0.0441  | 0.7227      | 0.0382      | 0.0158 | 0.9795 | 0.9574 | 0.0426    |
| 36  | 0.9849  | 0.0441  | 0.7069      | 0.0382      | 0.0159 | 0.9789 | 0.9585 | 0.0415    |
| 37  | 0.984   | 0.0441  | 0.6909      | 0.0382      | 0.0159 | 0.9784 | 0.9595 | 0.0405    |
| 38  | 0.9831  | 0.0441  | 0.675       | 0.0382      | 0.016  | 0.9778 | 0.9605 | 0.0395    |
| 39  | 0.9822  | 0.0441  | 0.659       | 0.0382      | 0.016  | 0.9772 | 0.9614 | 0.0386    |
| 40  | 0.9813  | 0.0126  | 0.643       | 0.0109      | 0.016  | 0.9766 | 0.9623 | 0.0377    |
| 41  | 0.9795  | 0.0126  | 0.6264      | 0.0109      | 0.0166 | 0.976  | 0.9289 | 0.0711    |
| 42  | 0.9777  | 0.0126  | 0.6099      | 0.0109      | 0.0165 | 0.9755 | 0.9303 | 0.0697    |
| 43  | 0.9768  | 0.0126  | 0.5941      | 0.0109      | 0.0159 | 0.9749 | 0.9646 | 0.0354    |
| 44  | 0.975   | 0.0126  | 0.5778      | 0.0109      | 0.0163 | 0.9743 | 0.933  | 0.067     |
| 45  | 0.9741  | 0.00315 | 0.5621      | 0.0027      | 0.0157 | 0.9737 | 0.966  | 0.034     |
| 46  | 0.9714  | 0.00315 | 0.5455      | 0.0027      | 0.0166 | 0.9732 | 0.9064 | 0.0936    |
| 47  | 0.9687  | 0.00315 | 0.5291      | 0.0027      | 0.0164 | 0.9726 | 0.9079 | 0.0921    |
| 48  | 0.966   | 0.00315 | 0.5128      | 0.0027      | 0.0162 | 0.972  | 0.9094 | 0.0906    |
| 49  | 0.9633  | 0.00315 | 0.4968      | 0.0027      | 0.016  | 0.9714 | 0.9108 | 0.0892    |
| 50  | 0.9615  | 0.00315 | 0.4814      | 0.0027      | 0.0154 | 0.9709 | 0.9397 | 0.0603    |

**Modern Human Life Table w/Primitive  $u^*$  ( $r = -0.0125, u^* = 0.3939, C = 0.5856$ )**

| $x$ | $l_x$   | $m_x$   | $\hat{l}_x$ | $\hat{m}_x$ | $f_x$  | $q_x$  | $c_x$  | $1 - c_x$ |
|-----|---------|---------|-------------|-------------|--------|--------|--------|-----------|
| 15  | 0.993   | 0.01155 | 0.9815      | 0.0116      | 0.0185 | 0.9885 | 0.6223 | 0.3777    |
| 16  | 0.993   | 0.01155 | 0.9695      | 0.0116      | 0.0121 | 0.9877 | 1      | 0         |
| 17  | 0.9921  | 0.01155 | 0.956       | 0.0116      | 0.0135 | 0.9869 | 0.9351 | 0.0649    |
| 18  | 0.9921  | 0.01155 | 0.9427      | 0.0116      | 0.0132 | 0.9862 | 1      | 0         |
| 19  | 0.9921  | 0.01155 | 0.929       | 0.0116      | 0.0137 | 0.9854 | 1      | 0         |
| 20  | 0.99174 | 0.04305 | 0.9144      | 0.043       | 0.0146 | 0.9847 | 0.9769 | 0.0231    |
| 21  | 0.9912  | 0.04305 | 0.8992      | 0.043       | 0.0152 | 0.9839 | 0.9673 | 0.0327    |
| 22  | 0.9912  | 0.04305 | 0.884       | 0.043       | 0.0152 | 0.9831 | 1      | 0         |
| 23  | 0.9912  | 0.04305 | 0.8684      | 0.043       | 0.0156 | 0.9824 | 1      | 0         |
| 24  | 0.9912  | 0.04305 | 0.8525      | 0.043       | 0.016  | 0.9816 | 1      | 0         |
| 25  | 0.9903  | 0.063   | 0.8354      | 0.063       | 0.0171 | 0.9809 | 0.9547 | 0.0453    |
| 26  | 0.9894  | 0.063   | 0.818       | 0.063       | 0.0174 | 0.9801 | 0.9563 | 0.0437    |
| 27  | 0.9894  | 0.063   | 0.8011      | 0.063       | 0.0169 | 0.9793 | 1      | 0         |
| 28  | 0.9894  | 0.063   | 0.7839      | 0.063       | 0.0172 | 0.9786 | 1      | 0         |
| 29  | 0.9894  | 0.063   | 0.7666      | 0.063       | 0.0174 | 0.9778 | 1      | 0         |
| 30  | 0.9885  | 0.0672  | 0.7483      | 0.0672      | 0.0183 | 0.9771 | 0.9618 | 0.0382    |
| 31  | 0.9876  | 0.0672  | 0.7299      | 0.0672      | 0.0184 | 0.9763 | 0.963  | 0.037     |
| 32  | 0.9876  | 0.0672  | 0.7121      | 0.0672      | 0.0178 | 0.9756 | 1      | 0         |
| 33  | 0.9867  | 0.0672  | 0.6935      | 0.0672      | 0.0186 | 0.9748 | 0.9651 | 0.0349    |
| 34  | 0.9867  | 0.0672  | 0.6755      | 0.0672      | 0.018  | 0.9741 | 1      | 0         |
| 35  | 0.9858  | 0.0441  | 0.6569      | 0.0441      | 0.0186 | 0.9733 | 0.967  | 0.033     |
| 36  | 0.9849  | 0.0441  | 0.6383      | 0.0441      | 0.0186 | 0.9725 | 0.9678 | 0.0322    |
| 37  | 0.984   | 0.0441  | 0.6197      | 0.0441      | 0.0186 | 0.9718 | 0.9686 | 0.0314    |
| 38  | 0.9831  | 0.0441  | 0.6012      | 0.0441      | 0.0185 | 0.971  | 0.9694 | 0.0306    |
| 39  | 0.9822  | 0.0441  | 0.5828      | 0.0441      | 0.0184 | 0.9703 | 0.9701 | 0.0299    |
| 40  | 0.9813  | 0.0126  | 0.5645      | 0.0126      | 0.0183 | 0.9695 | 0.9708 | 0.0292    |
| 41  | 0.9795  | 0.0126  | 0.5459      | 0.0126      | 0.0186 | 0.9688 | 0.9445 | 0.0555    |
| 42  | 0.9777  | 0.0126  | 0.5275      | 0.0126      | 0.0184 | 0.968  | 0.9456 | 0.0544    |
| 43  | 0.9768  | 0.0126  | 0.5098      | 0.0126      | 0.0177 | 0.9673 | 0.9726 | 0.0274    |
| 44  | 0.975   | 0.0126  | 0.4918      | 0.0126      | 0.018  | 0.9665 | 0.9478 | 0.0522    |
| 45  | 0.9741  | 0.00315 | 0.4746      | 0.0032      | 0.0173 | 0.9658 | 0.9737 | 0.0263    |
| 46  | 0.9714  | 0.00315 | 0.4567      | 0.0032      | 0.0179 | 0.9651 | 0.9265 | 0.0735    |
| 47  | 0.9687  | 0.00315 | 0.4392      | 0.0032      | 0.0175 | 0.9643 | 0.9278 | 0.0722    |
| 48  | 0.966   | 0.00315 | 0.422       | 0.0032      | 0.0172 | 0.9636 | 0.9289 | 0.0711    |
| 49  | 0.9633  | 0.00315 | 0.4052      | 0.0032      | 0.0168 | 0.9628 | 0.9301 | 0.0699    |
| 50  | 0.9615  | 0.00315 | 0.3891      | 0.0032      | 0.0161 | 0.9621 | 0.953  | 0.047     |

### C. Fecundity Schedule and Cancer Suppression

Here we discuss four variations of the baseline beaver life table adjusting the age at first reproduction, age at last reproduction, and the change in fecundity with age.

Halved  $m_x$  - Cut all  $m_x$  in half. This cuts  $R_0$  in half. This also selects for a larger  $u^*$ , 0.1414 vs the original 0.1010, as survivorship is now more important than fecundity.

Doubled  $m_x$  - Double all  $m_x$ . This doubles  $R_0$ . This also selects for a smaller  $u^*$ , 0.0808 vs the original 0.1010, as fecundity is now more important than survivorship.

Early Reproduction - Frontloading  $m_x$  where early values of  $m_x$  are doubled and later values of  $m_x$  are halved. The pivot point that matched the  $R_0$  occurred by just doubling the first two values of  $m_x$  and halving the rest. This early increased fecundity decreases  $u^*$ , 0.0707.

Late Reproduction - Backloading  $m_x$  where early values of  $m_x$  are halved and later values of  $m_x$  are doubled. The pivot point that matched the  $R_0$  occurred by just halving the first four values of  $m_x$  and doubling the rest. This late increased fecundity increases  $u^*$ , 0.1414.

|                  | Baseline Beaver<br>Life Table | Halved $m_x$ | Doubled $m_x$ | Early<br>Reproduction | Late<br>Reproduction |
|------------------|-------------------------------|--------------|---------------|-----------------------|----------------------|
| $R_0$ -no cancer | 2.2306                        | 1.1153       | 4.4612        | 2.1922                | 2.7497               |
| $r$ - no cancer  | 0.2198                        | 0.0252       | 0.4841        | 0.3288                | 0.2001               |
| $R_0$            | 2.0802                        | 1.0446       | 4.1309        | 2.0773                | 2.5313               |
| $r$              | 0.2046                        | 0.0102       | 0.4691        | 0.3133                | 0.1858               |
| $u^*$            | 0.101                         | 0.1414       | 0.0808        | 0.0707                | 0.1414               |
| $C$              | 0.022                         | 0.0161       | 0.0270        | 0.0305                | 0.0161               |

| x  | Baseline Beaver<br>$m_x$ | Halved $m_x$ | Doubled $m_x$ | Early<br>Reproduction | Late<br>Reproduction |
|----|--------------------------|--------------|---------------|-----------------------|----------------------|
| 1  | 0.5                      | 0.25         | 1             | 1                     | 0.25                 |
| 2  | 1.5                      | 0.75         | 3             | 3                     | 0.75                 |
| 3  | 2                        | 1            | 4             | 1                     | 1                    |
| 4  | 2                        | 1            | 4             | 1                     | 4                    |
| 5  | 2                        | 1            | 4             | 1                     | 4                    |
| 6  | 2                        | 1            | 4             | 1                     | 4                    |
| 7  | 2                        | 1            | 4             | 1                     | 4                    |
| 8  | 2                        | 1            | 4             | 1                     | 4                    |
| 9  | 2                        | 1            | 4             | 1                     | 4                    |
| 10 | 2                        | 1            | 4             | 1                     | 4                    |
| 11 | 2                        | 1            | 4             | 1                     | 4                    |
| 12 | 2                        | 1            | 4             | 1                     | 4                    |
| 13 | 2                        | 1            | 4             | 1                     | 4                    |
| 14 | 2                        | 1            | 4             | 1                     | 4                    |



**Baseline Life Table** $(r = 0.2046, u^* = 0.101, C = 0.022)$ 

| $x$ | $l_x$  | $m_x$ | $\hat{l}_x$ | $\hat{m}_x$ | $f_x$  | $q_x$  | $c_x$  | $1 - c_x$ |
|-----|--------|-------|-------------|-------------|--------|--------|--------|-----------|
| 1   | 0.4971 | 0.5   | 0.4956      | 0.4895      | 0.5044 | 0.997  | 0.006  | 0.994     |
| 2   | 0.3129 | 1.5   | 0.3101      | 1.4684      | 0.1856 | 0.994  | 0.016  | 0.984     |
| 3   | 0.2115 | 2     | 0.2077      | 1.9579      | 0.1023 | 0.991  | 0.027  | 0.973     |
| 4   | 0.1259 | 2     | 0.1222      | 1.9579      | 0.0856 | 0.988  | 0.0288 | 0.9712    |
| 5   | 0.096  | 2     | 0.0918      | 1.9579      | 0.0304 | 0.985  | 0.0593 | 0.9407    |
| 6   | 0.0735 | 2     | 0.069       | 1.9579      | 0.0228 | 0.9821 | 0.0711 | 0.9289    |
| 7   | 0.0614 | 2     | 0.0564      | 1.9579      | 0.0126 | 0.9791 | 0.1122 | 0.8878    |
| 8   | 0.0477 | 2     | 0.0428      | 1.9579      | 0.0136 | 0.9762 | 0.0966 | 0.9034    |
| 9   | 0.0439 | 2     | 0.0383      | 1.9579      | 0.0045 | 0.9732 | 0.2513 | 0.7487    |
| 10  | 0.0348 | 2     | 0.0295      | 1.9579      | 0.0088 | 0.9703 | 0.1262 | 0.8738    |
| 11  | 0.0215 | 2     | 0.0176      | 1.9579      | 0.0119 | 0.9674 | 0.0782 | 0.9218    |
| 12  | 0.0187 | 2     | 0.0148      | 1.9579      | 0.0028 | 0.9645 | 0.2153 | 0.7847    |
| 13  | 0.0115 | 2     | 0.0087      | 1.9579      | 0.006  | 0.9616 | 0.0909 | 0.9091    |
| 14  | 0.01   | 2     | 0.0073      | 1.9579      | 0.0014 | 0.9587 | 0.2419 | 0.7581    |

**Halved  $m_x$  Life Table** $(r = 0.0102, u^* = 0.1414, C = 0.0161)$ 

| $x$ | $l_x$  | $m_x$ | $\hat{l}_x$ | $\hat{m}_x$ | $f_x$  | $q_x$  | $c_x$  | $1 - c_x$ |
|-----|--------|-------|-------------|-------------|--------|--------|--------|-----------|
| 1   | 0.4971 | 0.25  | 0.4961      | 0.2425      | 0.5039 | 0.9978 | 0.0043 | 0.9957    |
| 2   | 0.3129 | 0.75  | 0.3109      | 0.7275      | 0.1852 | 0.9957 | 0.0115 | 0.9885    |
| 3   | 0.2115 | 1     | 0.2088      | 0.9700      | 0.1021 | 0.9936 | 0.0195 | 0.9805    |
| 4   | 0.1259 | 1     | 0.1232      | 0.9700      | 0.0856 | 0.9914 | 0.0207 | 0.9793    |
| 5   | 0.0960 | 1     | 0.0930      | 0.9700      | 0.0303 | 0.9893 | 0.0432 | 0.9568    |
| 6   | 0.0735 | 1     | 0.0703      | 0.9700      | 0.0227 | 0.9872 | 0.0519 | 0.9481    |
| 7   | 0.0614 | 1     | 0.0578      | 0.9700      | 0.0125 | 0.9850 | 0.0830 | 0.9170    |
| 8   | 0.0477 | 1     | 0.0441      | 0.9700      | 0.0136 | 0.9829 | 0.0712 | 0.9288    |
| 9   | 0.0439 | 1     | 0.0398      | 0.9700      | 0.0043 | 0.9808 | 0.1940 | 0.8060    |
| 10  | 0.0348 | 1     | 0.0310      | 0.9700      | 0.0089 | 0.9787 | 0.0939 | 0.9061    |
| 11  | 0.0215 | 1     | 0.0186      | 0.9700      | 0.0123 | 0.9766 | 0.0574 | 0.9426    |
| 12  | 0.0187 | 1     | 0.0158      | 0.9700      | 0.0028 | 0.9745 | 0.1646 | 0.8354    |
| 13  | 0.0115 | 1     | 0.0095      | 0.9700      | 0.0063 | 0.9724 | 0.0670 | 0.9330    |
| 14  | 0.0100 | 1     | 0.0080      | 0.9700      | 0.0015 | 0.9703 | 0.1865 | 0.8135    |

**Doubled  $m_x$  Life Table** $(r = 0.4691, u^* = 0.0808, C = 0.0270)$ 

| $x$ | $l_x$  | $m_x$ | $\hat{l}_x$ | $\hat{m}_x$ | $f_x$  | $q_x$  | $c_x$  | $1 - c_x$ |
|-----|--------|-------|-------------|-------------|--------|--------|--------|-----------|
| 1   | 0.4971 | 1     | 0.4953      | 0.9833      | 0.5047 | 0.9962 | 0.0074 | 0.9926    |
| 2   | 0.3129 | 3     | 0.3094      | 2.9499      | 0.1859 | 0.9925 | 0.0199 | 0.9801    |
| 3   | 0.2115 | 4     | 0.2068      | 3.9332      | 0.1026 | 0.9888 | 0.0335 | 0.9665    |
| 4   | 0.1259 | 4     | 0.1212      | 3.9332      | 0.0856 | 0.9850 | 0.0356 | 0.9644    |
| 5   | 0.0960 | 4     | 0.0907      | 3.9332      | 0.0305 | 0.9813 | 0.0729 | 0.9271    |
| 6   | 0.0735 | 4     | 0.0679      | 3.9332      | 0.0228 | 0.9776 | 0.0871 | 0.9129    |
| 7   | 0.0614 | 4     | 0.0552      | 3.9332      | 0.0127 | 0.9740 | 0.1361 | 0.8639    |
| 8   | 0.0477 | 4     | 0.0416      | 3.9332      | 0.0136 | 0.9703 | 0.1176 | 0.8824    |
| 9   | 0.0439 | 4     | 0.0370      | 3.9332      | 0.0046 | 0.9666 | 0.2948 | 0.7052    |
| 10  | 0.0348 | 4     | 0.0283      | 3.9332      | 0.0087 | 0.9630 | 0.1524 | 0.8476    |
| 11  | 0.0215 | 4     | 0.0167      | 3.9332      | 0.0116 | 0.9594 | 0.0956 | 0.9044    |
| 12  | 0.0187 | 4     | 0.0139      | 3.9332      | 0.0028 | 0.9558 | 0.2545 | 0.7455    |
| 13  | 0.0115 | 4     | 0.0082      | 3.9332      | 0.0058 | 0.9522 | 0.1106 | 0.8894    |
| 14  | 0.0100 | 4     | 0.0067      | 3.9332      | 0.0014 | 0.9486 | 0.2841 | 0.7159    |

### Early Reproduction

| Pivot point            | $R_0$         | $r$           | $u$           | $C$           | $R_0$ – without cancer | $r$ – without cancer |
|------------------------|---------------|---------------|---------------|---------------|------------------------|----------------------|
| Original $m_x$         | 2.0802        | 0.2046        | 0.101         | 0.022         | 2.2306                 | 0.2198               |
| All $m_x$ Halved - 0   | 1.0446        | 0.0102        | 0.1414        | 0.0161        | 1.1153                 | 0.0252               |
| 1                      | 1.4040        | 0.1124        | 0.1010        | 0.0220        | 1.4882                 | 0.1288               |
| <b>2</b>               | <b>2.0773</b> | <b>0.3133</b> | <b>0.0707</b> | <b>0.0305</b> | <b>2.1922</b>          | <b>0.3288</b>        |
| 3                      | 2.6867        | 0.4147        | 0.0707        | 0.0305        | 2.8268                 | 0.4296               |
| 4                      | 3.0432        | 0.4452        | 0.0707        | 0.0305        | 3.2044                 | 0.4600               |
| 5                      | 3.3177        | 0.4581        | 0.0808        | 0.0270        | 3.4925                 | 0.4729               |
| 6                      | 3.5181        | 0.4637        | 0.0808        | 0.0270        | 3.7130                 | 0.4786               |
| 7                      | 3.6810        | 0.4665        | 0.0808        | 0.0270        | 3.8971                 | 0.4815               |
| 8                      | 3.8038        | 0.4678        | 0.0808        | 0.0270        | 4.0401                 | 0.4828               |
| 9                      | 3.9130        | 0.4685        | 0.0808        | 0.0270        | 4.1717                 | 0.4835               |
| 10                     | 3.9965        | 0.4689        | 0.0808        | 0.0270        | 4.2763                 | 0.4839               |
| 11                     | 4.0459        | 0.4690        | 0.0808        | 0.0270        | 4.3406                 | 0.4840               |
| 12                     | 4.0870        | 0.4690        | 0.0808        | 0.0270        | 4.3967                 | 0.4841               |
| 13                     | 4.1110        | 0.4691        | 0.0808        | 0.0270        | 4.4312                 | 0.4841               |
| All $m_x$ Doubled - 14 | 4.1309        | 0.4691        | 0.0808        | 0.0270        | 4.4612                 | 0.4841               |

### Early reproduction $m_x$ according to pivot point.

| $x$ | Original $m_x$ | 0    | 1    | 2 | 3 | 4 | 5 | 6 | 7 | 8 | 9 | 10 | 11 | 12 | 13 | 14 |
|-----|----------------|------|------|---|---|---|---|---|---|---|---|----|----|----|----|----|
| 1   | 0.5            | 0.25 | 1    | 1 | 1 | 1 | 1 | 1 | 1 | 1 | 1 | 1  | 1  | 1  | 1  | 1  |
| 2   | 1.5            | 0.75 | 0.75 | 3 | 3 | 3 | 3 | 3 | 3 | 3 | 3 | 3  | 3  | 3  | 3  | 3  |
| 3   | 2              | 1    | 1    | 1 | 4 | 4 | 4 | 4 | 4 | 4 | 4 | 4  | 4  | 4  | 4  | 4  |
| 4   | 2              | 1    | 1    | 1 | 1 | 4 | 4 | 4 | 4 | 4 | 4 | 4  | 4  | 4  | 4  | 4  |
| 5   | 2              | 1    | 1    | 1 | 1 | 1 | 4 | 4 | 4 | 4 | 4 | 4  | 4  | 4  | 4  | 4  |
| 6   | 2              | 1    | 1    | 1 | 1 | 1 | 1 | 4 | 4 | 4 | 4 | 4  | 4  | 4  | 4  | 4  |
| 7   | 2              | 1    | 1    | 1 | 1 | 1 | 1 | 1 | 4 | 4 | 4 | 4  | 4  | 4  | 4  | 4  |
| 8   | 2              | 1    | 1    | 1 | 1 | 1 | 1 | 1 | 1 | 4 | 4 | 4  | 4  | 4  | 4  | 4  |
| 9   | 2              | 1    | 1    | 1 | 1 | 1 | 1 | 1 | 1 | 1 | 4 | 4  | 4  | 4  | 4  | 4  |
| 10  | 2              | 1    | 1    | 1 | 1 | 1 | 1 | 1 | 1 | 1 | 1 | 4  | 4  | 4  | 4  | 4  |
| 11  | 2              | 1    | 1    | 1 | 1 | 1 | 1 | 1 | 1 | 1 | 1 | 1  | 4  | 4  | 4  | 4  |
| 12  | 2              | 1    | 1    | 1 | 1 | 1 | 1 | 1 | 1 | 1 | 1 | 1  | 1  | 4  | 4  | 4  |
| 13  | 2              | 1    | 1    | 1 | 1 | 1 | 1 | 1 | 1 | 1 | 1 | 1  | 1  | 1  | 4  | 4  |
| 14  | 2              | 1    | 1    | 1 | 1 | 1 | 1 | 1 | 1 | 1 | 1 | 1  | 1  | 1  | 1  | 4  |

### Early reproduction life table at Pivot = 2 ( $r = 0.3133, u^* = 0.0707, C = 0.0305$ )

| $x$ | $l_x$  | $m_x$ | $\hat{l}_x$ | $\hat{m}_x$ | $f_x$  | $q_x$  | $c_x$  | $1 - c_x$ |
|-----|--------|-------|-------------|-------------|--------|--------|--------|-----------|
| 1   | 0.4971 | 1     | 0.4950      | 0.9854      | 0.5050 | 0.9957 | 0.0085 | 0.9915    |
| 2   | 0.3129 | 3     | 0.3089      | 2.9563      | 0.1861 | 0.9914 | 0.0226 | 0.9774    |
| 3   | 0.2115 | 1     | 0.2061      | 0.9854      | 0.1027 | 0.9872 | 0.0381 | 0.9619    |
| 4   | 0.1259 | 1     | 0.1206      | 0.9854      | 0.0856 | 0.9829 | 0.0405 | 0.9595    |
| 5   | 0.0960 | 1     | 0.0900      | 0.9854      | 0.0306 | 0.9787 | 0.0824 | 0.9176    |
| 6   | 0.0735 | 1     | 0.0671      | 0.9854      | 0.0229 | 0.9745 | 0.0982 | 0.9018    |
| 7   | 0.0614 | 1     | 0.0544      | 0.9854      | 0.0128 | 0.9703 | 0.1524 | 0.8476    |
| 8   | 0.0477 | 1     | 0.0408      | 0.9854      | 0.0136 | 0.9661 | 0.1319 | 0.8681    |
| 9   | 0.0439 | 1     | 0.0361      | 0.9854      | 0.0047 | 0.9620 | 0.3228 | 0.6772    |
| 10  | 0.0348 | 1     | 0.0275      | 0.9854      | 0.0086 | 0.9578 | 0.1701 | 0.8299    |
| 11  | 0.0215 | 1     | 0.0161      | 0.9854      | 0.0114 | 0.9537 | 0.1075 | 0.8925    |
| 12  | 0.0187 | 1     | 0.0133      | 0.9854      | 0.0028 | 0.9496 | 0.2800 | 0.7200    |
| 13  | 0.0115 | 1     | 0.0078      | 0.9854      | 0.0056 | 0.9455 | 0.1241 | 0.8759    |
| 14  | 0.0100 | 1     | 0.0064      | 0.9854      | 0.0014 | 0.9415 | 0.3112 | 0.6888    |

**Late reproduction**

| Pivot point           | $R_0$         | $r$           | $u$           | $C$           | $R_0$ – without cancer | $r$ – without cancer |
|-----------------------|---------------|---------------|---------------|---------------|------------------------|----------------------|
| Original $m_x$        | 2.0802        | 0.2046        | 0.101         | 0.022         | 2.2306                 | 0.2198               |
| All $m_x$ Doubled - 0 | 4.1309        | 0.4691        | 0.0808        | 0.0270        | 4.4612                 | 0.4841               |
| 1                     | 3.7965        | 0.3758        | 0.1010        | 0.0220        | 4.0883                 | 0.3902               |
| 2                     | 3.1308        | 0.2639        | 0.1212        | 0.0186        | 3.3843                 | 0.2781               |
| <b>3</b>              | <b>2.5313</b> | <b>0.1858</b> | <b>0.1414</b> | <b>0.0161</b> | <b>2.7497</b>          | <b>0.2001</b>        |
| 4                     | 2.1758        | 0.1451        | 0.1515        | 0.0151        | 2.3720                 | 0.1594               |
| 5                     | 1.9074        | 0.1161        | 0.1616        | 0.0142        | 2.0840                 | 0.1306               |
| 6                     | 1.7028        | 0.0945        | 0.1616        | 0.0142        | 1.8635                 | 0.1091               |
| 7                     | 1.5342        | 0.0763        | 0.1616        | 0.0142        | 1.6794                 | 0.0912               |
| 8                     | 1.4061        | 0.0618        | 0.1717        | 0.0134        | 1.5364                 | 0.0768               |
| 9                     | 1.2884        | 0.0476        | 0.1616        | 0.0142        | 1.4047                 | 0.0628               |
| 10                    | 1.1974        | 0.0354        | 0.1616        | 0.0142        | 1.3002                 | 0.0508               |
| 11                    | 1.1426        | 0.0273        | 0.1616        | 0.0142        | 1.2358                 | 0.0427               |
| 12                    | 1.0958        | 0.0197        | 0.1515        | 0.0151        | 1.1798                 | 0.0350               |
| 13                    | 1.0680        | 0.0147        | 0.1515        | 0.0151        | 1.1453                 | 0.0299               |
| All $m_x$ Halved - 14 | 1.0446        | 0.0102        | 0.1414        | 0.0161        | 1.1153                 | 0.0252               |

**Late reproduction  $m_x$  according to pivot point.**

| $x$ | Original $m_x$ | 0 | 1    | 2    | 3           | 4    | 5    | 6    | 7    | 8    | 9    | 10   | 11   | 12   | 13   | 14   |
|-----|----------------|---|------|------|-------------|------|------|------|------|------|------|------|------|------|------|------|
| 1   | 0.5            | 1 | 0.25 | 0.25 | <b>0.25</b> | 0.25 | 0.25 | 0.25 | 0.25 | 0.25 | 0.25 | 0.25 | 0.25 | 0.25 | 0.25 | 0.25 |
| 2   | 1.5            | 3 | 3    | 0.75 | <b>0.75</b> | 0.75 | 0.75 | 0.75 | 0.75 | 0.75 | 0.75 | 0.75 | 0.75 | 0.75 | 0.75 | 0.75 |
| 3   | 2              | 4 | 4    | 4    | <b>1</b>    | 1    | 1    | 1    | 1    | 1    | 1    | 1    | 1    | 1    | 1    | 1    |
| 4   | 2              | 4 | 4    | 4    | <b>4</b>    | 1    | 1    | 1    | 1    | 1    | 1    | 1    | 1    | 1    | 1    | 1    |
| 5   | 2              | 4 | 4    | 4    | <b>4</b>    | 4    | 1    | 1    | 1    | 1    | 1    | 1    | 1    | 1    | 1    | 1    |
| 6   | 2              | 4 | 4    | 4    | <b>4</b>    | 4    | 4    | 1    | 1    | 1    | 1    | 1    | 1    | 1    | 1    | 1    |
| 7   | 2              | 4 | 4    | 4    | <b>4</b>    | 4    | 4    | 4    | 1    | 1    | 1    | 1    | 1    | 1    | 1    | 1    |
| 8   | 2              | 4 | 4    | 4    | <b>4</b>    | 4    | 4    | 4    | 4    | 1    | 1    | 1    | 1    | 1    | 1    | 1    |
| 9   | 2              | 4 | 4    | 4    | <b>4</b>    | 4    | 4    | 4    | 4    | 4    | 1    | 1    | 1    | 1    | 1    | 1    |
| 10  | 2              | 4 | 4    | 4    | <b>4</b>    | 4    | 4    | 4    | 4    | 4    | 4    | 1    | 1    | 1    | 1    | 1    |
| 11  | 2              | 4 | 4    | 4    | <b>4</b>    | 4    | 4    | 4    | 4    | 4    | 4    | 4    | 1    | 1    | 1    | 1    |
| 12  | 2              | 4 | 4    | 4    | <b>4</b>    | 4    | 4    | 4    | 4    | 4    | 4    | 4    | 4    | 1    | 1    | 1    |
| 13  | 2              | 4 | 4    | 4    | <b>4</b>    | 4    | 4    | 4    | 4    | 4    | 4    | 4    | 4    | 4    | 1    | 1    |
| 14  | 2              | 4 | 4    | 4    | <b>4</b>    | 4    | 4    | 4    | 4    | 4    | 4    | 4    | 4    | 4    | 4    | 1    |

**Late reproduction life table at Pivot = 3 ( $r = 0.1858, u^* = 0.1414, C = 0.0161$ )**

| $x$ | $l_x$  | $m_x$ | $\hat{l}_x$ | $\hat{m}_x$ | $f_x$  | $q_x$  | $c_x$  | $1 - c_x$ |
|-----|--------|-------|-------------|-------------|--------|--------|--------|-----------|
| 1   | 0.4971 | 0.25  | 0.4961      | 0.2425      | 0.5039 | 0.9978 | 0.0043 | 0.9957    |
| 2   | 0.3129 | 0.75  | 0.3109      | 0.7275      | 0.1852 | 0.9957 | 0.0115 | 0.9885    |
| 3   | 0.2115 | 1     | 0.2088      | 0.9700      | 0.1021 | 0.9936 | 0.0195 | 0.9805    |
| 4   | 0.1259 | 4     | 0.1232      | 3.8799      | 0.0856 | 0.9914 | 0.0207 | 0.9793    |
| 5   | 0.0960 | 4     | 0.0930      | 3.8799      | 0.0303 | 0.9893 | 0.0432 | 0.9568    |
| 6   | 0.0735 | 4     | 0.0703      | 3.8799      | 0.0227 | 0.9872 | 0.0519 | 0.9481    |
| 7   | 0.0614 | 4     | 0.0578      | 3.8799      | 0.0125 | 0.9850 | 0.0830 | 0.9170    |
| 8   | 0.0477 | 4     | 0.0441      | 3.8799      | 0.0136 | 0.9829 | 0.0712 | 0.9288    |
| 9   | 0.0439 | 4     | 0.0398      | 3.8799      | 0.0043 | 0.9808 | 0.1940 | 0.8060    |
| 10  | 0.0348 | 4     | 0.0310      | 3.8799      | 0.0089 | 0.9787 | 0.0939 | 0.9061    |
| 11  | 0.0215 | 4     | 0.0186      | 3.8799      | 0.0123 | 0.9766 | 0.0574 | 0.9426    |
| 12  | 0.0187 | 4     | 0.0158      | 3.8799      | 0.0028 | 0.9745 | 0.1646 | 0.8354    |
| 13  | 0.0115 | 4     | 0.0095      | 3.8799      | 0.0063 | 0.9724 | 0.0670 | 0.9330    |
| 14  | 0.0100 | 4     | 0.0080      | 3.8799      | 0.0015 | 0.9703 | 0.1865 | 0.8135    |

#### D. $Q$ , $a$ , and $b$ Parameter Study

**Effect of changes on  $b$ .** When  $b = 0$ , there is no penalty so the maximum will occur at  $u = 1$ . As  $b$  increases, cancer resistance becomes more costly, forcing the optimal  $u$  to be smaller and decreasing the maximum  $r$  the population can sustain.  $r$  never switches to negative.

|                          | $b$ | $u_{max}$ | $r_{max}$ |
|--------------------------|-----|-----------|-----------|
| $Q = 0.97$<br>$a = 0.01$ | 0   | ---       | ---       |
|                          | 0.1 | 0.1414    | 0.2089    |
|                          | 0.2 | 0.1010    | 0.2046    |
|                          | 0.5 | 0.0707    | 0.1961    |
|                          | 1   | 0.0505    | 0.1865    |
|                          | 2   | 0.0303    | 0.1726    |
|                          | 5   | 0.0202    | 0.1459    |

**Effect of changes on  $a$ .** If  $a$  is small, no cancer prevention is necessary. As  $a$  increases, cancer prevention becomes important, though does cause a decrease in  $r$ . The point where  $r$  switches from positive to negative occurs at  $a = 0.1259$ .

|                         | $a$    | $u_{max}$ | $r_{max}$ |
|-------------------------|--------|-----------|-----------|
| $Q = 0.97$<br>$b = 0.2$ | 0      | 0.0101    | 0.2191    |
|                         | 0.1    | 0.2929    | 0.1691    |
|                         | 0.2    | 0.3838    | 0.1455    |
|                         | 0.5    | 0.5253    | 0.0941    |
|                         | 1      | 0.6263    | 0.0288    |
|                         | 0.1259 | 0.6667    | 0         |
|                         | 2      | 0.7273    | -0.0764   |
|                         | 5      | 0.8283    | -0.3268   |
|                         | 10     | 0.8788    | -0.6705   |
|                         | 20     | 0.9192    | -1.2597   |

**Effect of changes on  $Q$ .** If  $Q$  is large then cancer prevention is a trivial because the organism has a very small chance of dying from cancer. As  $Q$  approaches 0 cancer prevention becomes necessary though the penalty in  $r$  can be seen again.  $r$  never switches to negative.

|                         | $Q$ | $u_{max}$ | $r_{max}$ |
|-------------------------|-----|-----------|-----------|
| $a = 0.01$<br>$b = 0.2$ | 0.0 | ---       | ---       |
|                         | 0.1 | 0.5859    | 0.0589    |
|                         | 0.2 | 0.5354    | 0.0899    |
|                         | 0.3 | 0.4848    | 0.1103    |
|                         | 0.4 | 0.4444    | 0.1262    |
|                         | 0.5 | 0.4040    | 0.1399    |
|                         | 0.6 | 0.3636    | 0.1524    |
|                         | 0.7 | 0.3131    | 0.1645    |
|                         | 0.8 | 0.2626    | 0.1769    |
|                         | 0.9 | 0.1818    | 0.1910    |
|                         | 1.0 | 0.0101    | 0.2191    |
